# Supplementary material
Source: PubMed Central journal article supplement (PMC4972264)
Supplement: supp_pp.16.00137_PP2016-00137R2_Supplemental_Materialtbls.pdf [file supp_pp.16.00137_PP2016-00137R2_Supplemental_Materialtbls.pdf]

**Supplementary Table S1. Candidates of CYP genes and knockdown vectors in the current study**

| Gene Name           | CYP Number | Knockdown Vector | Primers for Knockdown Vector | Sol Unigene |
|---------------------|------------|------------------|------------------------------|-------------|
| <i>PGA1</i>         | CYP72A208  | pKT226           | U724 / U725                  | SGN-U268724 |
| <i>PGA1</i>         | CYP72A208  | pKT249           | U869 / U870                  | SGN-U268724 |
| <i>PGA2</i>         | CYP72A188  | pKT227           | U726 / U727                  | SGN-U272045 |
| <i>PGA3 (GAME4)</i> | CYP80B     | pKT230           | U744 / U745                  | SGN-U269971 |
|                     | CYP90A5    | pKT217           | U673 / U674                  | SGN-U276200 |
|                     | CYP72A.21P | pKT231           | U746 / U747                  | SGN-U269680 |
|                     | CYP80F3    | pKT232           | U748 / U749                  | SGN-U272362 |
|                     | CYP88C4    | pKT233           | U750 / U751                  | SGN-U273175 |
|                     | CYP71D198  | pKT239           | U792 / U793                  | SGN-U279998 |
|                     | CYP76Y8    | pKT236           | U794 / U795                  | SGN-U272961 |
|                     | CYP76A6    | pKT237           | U796 / U797                  | SGN-U281374 |
|                     | CYP82M3    | pKT238           | U798 / U799                  | SGN-U274308 |
|                     | CYP716A43  | pKT240           | U800 / U801                  | SGN-U280549 |
|                     | CYP71D232  | pKT245           | U829 / U830                  | SGN-U268965 |
| CYP76B21a           | pKT246     | U831 / U832      | SGN-U273164                  |             |
| CYP71AT21           | pKT247     | U835 / U836      | SGN-U272510                  |             |

**Supplementary Table S2. Oligonucleotides used in the current study**

| Name             | Sequence 5' to 3'                 | Description                                        |
|------------------|-----------------------------------|----------------------------------------------------|
| U841             | GCTTGCTCTGTTCTTGACATCTC           | PGA1 cloning                                       |
| U842             | TGAAAAGCAGAATTAGCAGCA             | PGA1 cloning                                       |
| U875             | CCAAGGGACAGAGCAATCAA              | PGA2 cloning                                       |
| U876             | TGATGTGAACCTTGAGATTGGTG           | PGA2 cloning                                       |
| NP2              | TAAAGCACGAGGAAGCGGT               | Check of transformants (kanamycin resistance gene) |
| NP3              | GCACAACAGACAATCGGCT               | Check of transformants (kanamycin resistance gene) |
| U724             | GAGCTCTAGAGAAGCAAAGAAAACACC       | PGA1 Knockdown                                     |
| U725             | GGATCCATATGCTAACCAATTCCTCCCATC    | PGA1 Knockdown                                     |
| U869             | GAGCTCTAGACCACAGCTTTGCTCTCTTG     | PGA1 Knockdown                                     |
| U870             | GGATCCATATGCATCGTCTCCCCATACT      | PGA1 Knockdown                                     |
| U726             | GAGCTCTAGAGGTTAAGAGTTTGCCCAACG    | PGA2 Knockdown                                     |
| U727             | GGATCCATATGGCTTTCTCTTGCCAATCTG    | PGA2 Knockdown                                     |
| EF1 $\alpha$ _Fw | GCTTGGTGGAAATTGACAAGCGTGTTA       | RT-PCR for control (EF1 $\alpha$ )                 |
| EF1 $\alpha$ _Rv | CAATGGTGATACCACGCTCAGTTC          | RT-PCR for control (EF1 $\alpha$ )                 |
| potato C_Fw      | CATTATGGTGGTGGCCAAAGATGATCG       | RT-PCR for PGA1                                    |
| potato C_Rv      | CCCAAGGAACGATATCATGATTTACTAACGGTG | RT-PCR for PGA1                                    |
| potato D_Fw      | TGTATGGTGGCGTCCCAAAACAGTAG        | RT-PCR for PGA2                                    |
| potato D_Rv      | TGTGAAATCGTGGTGAATGGCATG          | RT-PCR for PGA2                                    |
| U744             | GAGCTCTAGAGGTTTGGGACAGGAGGAAT     | PGA3 Knockdown                                     |
| U745             | GGATCCATATGCAAGCCTGTGCATCTTAT     | PGA3 Knockdown                                     |
| U673             | GAGCTCTAGAGCTATCCCGTTTCGATACA     | CYP90A5 Knockdown                                  |
| U674             | GGATCCATATGCGGTAGGTGGGATGAGAAAA   | CYP90A5 Knockdown                                  |
| U746             | GAGCTCTAGAATTGCTTAAGGCAAAGAGGTC   | CYP72A.21P Knockdown                               |
| U747             | GGATCCATATGCTTTAACTTCTCGACA       | CYP72A.21P Knockdown                               |
| U748             | GAGCTCTAGAGGGGAGCCCTGTTTTCTAA     | CYP80F3 Knockdown                                  |
| U749             | GGATCCATATGAACAATGTCTCCCAAAC      | CYP80F3 Knockdown                                  |
| U750             | GAGCTCTAGACATGGGCTGGCCATTAGTA     | CYP88C4 Knockdown                                  |
| U751             | GGATCCATATGGTTCTTCCATGTCAACCA     | CYP88C4 Knockdown                                  |
| U792             | GAGCTCTAGAGCATTTTCCCTACTTCATCTTT  | CYP71D198 Knockdown                                |
| U793             | GGATCCATATGAACTAAAGCCTATGTC       | CYP71D198 Knockdown                                |
| U794             | GAGCTCTAGACATGGCCCTCTCATGACTC     | CYP76Y8 Knockdown                                  |
| U795             | GGATCCATATGCCGATCCACTCTCACACTG    | CYP76Y8 Knockdown                                  |
| U796             | GAGCTCTAGAAGCAATGGCCAAAGTGA       | CYP76A6 Knockdown                                  |
| U797             | GGATCCATATGCAAAATGCATCATTGAT      | CYP76A6 Knockdown                                  |
| U798             | GAGCTCTAGAAAACGTCCCTCTAGCACGA     | CYP82M3 Knockdown                                  |
| U799             | GGATCCATATGATGCTAATTTCCACCTCAGA   | CYP82M3 Knockdown                                  |
| U800             | GAGCTCTAGAATGGGTCCCTTTCAAAGAA     | CYP716A43 Knockdown                                |
| U801             | GGATCCATATGCAAAATCTCTGCATCATT     | CYP716A43 Knockdown                                |
| U829             | GAGCTCTAGATGCAGAACCAATCAAACCAA    | CYP71D232 Knockdown                                |
| U830             | GGATCCATATGGCCTAGATGCAAAAGCAAG    | CYP71D232 Knockdown                                |
| U831             | GAGCTCTAGAGCCTAATTGAGCCAAGCAA     | CYP76B21a Knockdown                                |
| U832             | GGATCCATATGCGTCTGGAGCAAACCTAT     | CYP76B21a Knockdown                                |
| U835             | GAGCTCTAGATGTGTTGGTTGCTGGATCA     | CYP71AT21 Knockdown                                |
| U836             | GGATCCATATGCAATTGCCCATGCGTTAATA   | CYP71AT21 Knockdown                                |
